# Supplementary material
Source: PubMed Central journal article supplement (PMC10592283)
Supplement: NIHMS1920904-supplement-Supplemental_Publication_Material.pdf [file NIHMS1920904-supplement-Supplemental_Publication_Material.pdf]

# **Title: Classification and Predictors of Right Ventricular Functional Recovery in Pulmonary Arterial Hypertension**

## **Online Data Supplement**

Franz P. Rischard<sup>\*1</sup>, Roberto J. Bernardo<sup>2</sup>, Rebecca R. Vanderpool<sup>3</sup>, Deborah H. Kwon<sup>4</sup>, Tushar Acharya<sup>5</sup>, Margaret M Park<sup>4</sup>, Austin Katrynuik<sup>6</sup>, Michael Insel<sup>1</sup>, Saad Kubba<sup>5</sup>, Roberto Badagliacca<sup>7</sup>, A Brett Larive<sup>8</sup>, Robert Naeije<sup>9</sup>, Gerald J Beck<sup>8</sup>, Serpil C Erzurum<sup>10</sup>, Robert P Frantz<sup>11</sup>, Paul M Hassoun<sup>12</sup>, Anna R Hemnes<sup>13</sup>, Nicholas S Hill<sup>14</sup>, Evelyn M Horn<sup>15</sup>, Joe G.N. Garcia<sup>6</sup>, Jane A Leopold<sup>16</sup>, Erika Berman Rosenzweig<sup>17</sup>, W.H. Wilson Tang<sup>4</sup>, Jennifer D. Wilcox<sup>18</sup>

**\***Dr. Rischard is both the first and lead author. Co-authors are then placed in order of contribution. If authors contributed equally, they are then listed alphabetically

<sup>1</sup>Division of Pulmonary, Allergy, Critical Care and Sleep Medicine, University of Arizona

<sup>2</sup>Division of Pulmonary, Critical Care and Sleep Medicine, University of Oklahoma Health Sciences Center, Oklahoma City, OK

<sup>3</sup>Division of Cardiovascular Medicine, The Ohio State University

<sup>4</sup>Department of Cardiovascular Medicine, Cleveland Clinic

<sup>5</sup>Division of Cardiology, University of Arizona, Tucson, AZ

<sup>6</sup>Department of Medicine, University of Arizona

<sup>7</sup>Department of Cardiovascular and Respiratory Science, Sapienza University of Rome, Rome, Italy

<sup>8</sup>Department of Quantitative Health Sciences, Cleveland Clinic

<sup>9</sup>Department of Pathophysiology, Free University of Brussels, Brussels, Belgium

<sup>10</sup>Lerner Research Institute, Cleveland Clinic

<sup>11</sup>Department of Cardiovascular Medicine, Mayo Clinic

<sup>12</sup>Division of Pulmonary and Critical Care Medicine, Johns Hopkins University

<sup>13</sup>Division of Allergy, Pulmonary and Critical Care Medicine, Vanderbilt University Medical Center

<sup>14</sup>Division of Pulmonary, Critical Care, and Sleep Medicine, Tufts Medical Center

<sup>15</sup>Perkin Heart Failure Center, Division of Cardiology, Weill Cornell Medicine

<sup>16</sup>Division of Cardiovascular Medicine, Brigham and Women's Hospital, Harvard Medical School

<sup>17</sup>Department of Pediatrics and Medicine, Columbia University

<sup>18</sup>Department of Cardiovascular and Metabolic Sciences, Cleveland Clinic

## **Supplemental Methods on Prospective Subject Follow-up Protocol**

All treatment-naïve patients at the University of Arizona are encouraged to enroll in our protocolized PAH registry. Over 90% of incident patients participate at UA. This study began enrollment 1/1/12. As shown in supplemental **Figure S1**, enrolled patients undergo right heart catheterization, 6 minute-walk test, echocardiography, cardiac MRI, BNP or NT pro-BNP at baseline (diagnosis for most). Invasive cardiopulmonary exercise (iCPET) testing is done for patients' functional class (FC) I-IIIb. This testing is repeated on therapy at 3-6 months and 6-12 months depending on baseline presentation and achievement of therapeutic goals (see therapeutic strategy). All patients not FC IV undergo iCPET at follow-up. For the current analysis, the first follow-up assessment was omitted to allow for sufficient time for RV functional and morphologic changes to occur if therapeutic changes occurred at the first (~3 month) assessment (see therapeutic strategy below). We have previously published MRI changes in a subset of the current cohort at the first assessment.<sup>20,34</sup> **Supplemental Figure S2** depicts the STROBE diagram (strengthening the reporting of observational studies in epidemiology) indicating subject eligibility for this analysis.

## **Supplemental Methods and Results on Therapeutic Strategy**

Patients were categorized by therapeutic strategy based on the European Respiratory Society/European Society of Cardiology (ERS/ESC) guidelines of 2015 at which goal-directed mono or sequential therapy was replaced by up-front combination therapy<sup>16</sup>. Prior to 2015, a goal-directed sequential combination therapy was used based on achievement of functional class (FC) I-II. After diagnosis, if FC I-II was not achieved by 3-6 months re-assessment, then combination therapy was added. Therefore, if a

patient remained on treprostinil monotherapy, the therapeutic goal was achieved. In this context, combination therapy before 2015 represents treatment failure of treprostinil monotherapy. After 2015, all patients were placed on up-front combination therapy in accordance with updated guidelines. Prior to 2015, 21 patients were placed on sequential combination therapy, 50% of the 42 patients treated before 2015. Of those 21, 2 patients were placed on endothelin antagonist (ERA)+treprostinil, 8 patients on phosphodiesterase 5 inhibitor (PDE5i)+treprostinil, 3 patients on riociguat+treprostinil, and 8 patients on triple therapy with ERA+PDE5i+treprostinil before follow-up. Of the 21 treated with up-front combination therapy after 2015, 4 patients were placed on ERA+treprostinil, 7 patients on PDE5i+treprostinil, and 10 patients on triple therapy with ERA+PDE5i+treprostinil. 8/13 (62%) of RVFnRec on combination therapy were on triple therapy while of the 10/29 (35%) of no RVFnRec patients were on triple therapy (P=0.10).

### **Supplemental MRI Methods**

The imaging protocol included short axis (SAX) stack analysis of volumes for both the left ventricle (LV) and right ventricle (RV). Q flow analysis included phase imaging of the main pulmonary artery (PA). Additionally, PA Q flow analysis and SAX data were used to calculate TV regurgitant volume (TVRV) as (RV stroke volume (RVSV) – PA Q flow forward volume), and regurgitant fraction as (TVRV / RVSV). Since quantification of TR was not a primary aim of this study, all factors affecting this quantification were not considered. For example, net Q flow may overestimated since pulmonic insufficiency (backward volume) was not taken into consideration.

RV and left ventricular (LV) ejection fraction (EF), RV and LV end-diastolic/systolic volumes (EDV/ESV), RV stroke volume (SV), RV and LV mass were derived by

contouring the endocardial border on the end-diastolic phase and the endocardial border on the end-systolic phases with papillary muscles and trabeculations included as part of the blood pool. RV and LV end systolic phases and end diastolic phases were identified on separate phases when significant RV/LV uncoupling was present and was defined as the phase where the RV or LV was the smallest to define end systole and largest to define end diastole. The long axis 4 chamber view was used as a reference image allowing for determination of basal slice inclusion while outlining the LV and RV endocardial border. RV and LV stroke volumes were compared and used to additionally guide inclusion of a basal slice (only when there was no suspicion of shunt). Careful assessment to delineate the RVOT from the pulmonic valve and right atrium was performed by stepping through each cardiac phase multiple times to identify the appropriate borders. The basal-most left ventricular slice was included if the myocardium extended to  $\geq 50\%$  of the circumference of the short axis slice.

RV mass was determined on the end-diastolic phase by contouring the epicardial border in addition to the endocardial border. Contour smoothing was performed on the endocardium and trabeculations included in the blood pool (excluded from mass calculations). The interventricular septum was included with the left ventricular mass. The myocardial volume for each slice was calculated by multiplying the area of the RV wall by the slice thickness. RV and LV mass was calculated as the product of the sum total of the myocardial slice volumes for each ventricle multiplied by  $1.05 \text{ g/cm}^3$ <sup>51</sup>. Ventricular volumes and ventricular mass were indexed by body surface area.

An intra-class coefficient was calculated using a two-way random effects model detecting an absolute difference in ventricular volumes to assess inter-reader variability.

CMR inter-reader variability was examined by intra-class correlation performed on 50 control and PAH subjects (22 controls and 28 PAH) demonstrating high agreement of 0.98 (95% CI 0.98-0.99,  $P < 0.001$ ), 0.99 (95% CI 0.98-0.99,  $P < 0.001$ ), and 0.96 (95% CI 0.92-0.98,  $P < 0.001$ ) for RVEDV, RVESV, RVEF, respectively.

## Supplemental Tables

| MRI Variables                     | VO <sub>2peak</sub> >15 mL/kg/min |                  |         |
|-----------------------------------|-----------------------------------|------------------|---------|
|                                   | Youden Index (Cutoff)             | AOC (95%CI)      | P-value |
| <b>RVEF</b>                       |                                   |                  |         |
| Change in RVEF (%)                | 0.51 (4.1)                        | 0.74 (0.66-0.89) | 0.0001  |
| Relative change in RVEF (%)       | 0.61 (15)                         | 0.74 (0.62-0.86) | 0.002   |
| RVEF at FU (%)                    | 0.55 (37)                         | 0.73 (0.62-0.88) | 0.001   |
| <b>RVEDV</b>                      |                                   |                  |         |
| Change in RVEDV (mL)              | 0.74 (-15)                        | 0.87 (0.77-0.96) | 0.0001  |
| Relative change in RVEDV (%)      | 0.72 (-6.5)                       | 0.87 (0.77-0.96) | 0.0001  |
| RVEDVI at FU (mL/m <sup>2</sup> ) | 0.40 (112)                        | 0.67 (0.53-0.80) | 0.03    |
| <b>RVESV</b>                      |                                   |                  |         |
| Change in RVESV (mL)              | 0.63 (-47)                        | 0.86 (0.77-0.95) | 0.0001  |
| Relative change in RVESV (%)      | 0.72 (-30)                        | 0.88 (0.80-0.98) | 0.0001  |
| RVESVI at FU (mL/m <sup>2</sup> ) | 0.42 (66)                         | 0.72 (0.59-0.86) | 0.004   |

**Table S1. Potential right ventricular defining MRI parameters of functional recovery predicting exercise capacity at follow-up.** Exercise capacity is defined by peak oxygen consumption >15 mL/kg/min by guidelines<sup>25</sup> and evidence<sup>26</sup>. RVEF, right ventricular ejection fraction; RVEDV, RV end-diastolic volume; RVESV, RV end-systolic volume; FU, follow-up.

|                      | PAH                 |             |                  | Healthy Control |             |                  |
|----------------------|---------------------|-------------|------------------|-----------------|-------------|------------------|
|                      | Mean±SD             | 95% CI      | 5/95 Percentiles | Mean±SD         | 95% CI      | 5/95 Percentiles |
| <b>RVEDV (%)</b>     | <b>116.4±41.0*</b>  | 105.8-126.9 | 73.4/224.1       | 71.1±13.0       | 67.8-74.4   | 51.0/93.4        |
| <b>RVEDVI (%)</b>    | <b>151.9±60.2*</b>  | 136.8-168.3 | 91.2/268.6       | 90.8±16.8       | 86.4-95.0   | 65.8/120.6       |
| <b>RVESVI (%)</b>    | <b>298.9±155.5*</b> | 187.1-980.0 | 188.4/768.7      | 114.0±29.       | 106.4-121.5 | 67.9/171.5       |
| <b>RVEF (%)</b>      | <b>52.72±14.8*</b>  | 23.8-84.9   | 29.9/71.6        | 86.99±9.4       | 84.6-89.4   | 71.1/101.4       |
| <b>RVEF MESA (%)</b> | <b>51.1±14.6*</b>   | 47.5-55.2   | 22.2/78.0        | 84.2±8.7        | 82.0-86.4   | 70.2/98.7        |
| <b>RVMI (%)</b>      | <b>154.3±67.6*</b>  | 59.0-339.4  | 98.0/279.8       | 43.55±13.       | 40.1-46.8   | 23.4/71.6        |
| <b>LVESVI (%)</b>    | 114.5±41.0          | 15.4-246.8  | 71.7/205.1       | 117.0±25.       | 110.6-123.4 | 79.0/173.1       |
| <b>LVEDVI (%)</b>    | 86.7±21.0           | 60.4-123.9  | 66.5/110.6       | 92.6±16.1       | 88.5-96.7   | 67.1/117.1       |
| <b>LVEF (%)</b>      | 84.9±12.1           | 35.3-124.6  | 45.7/106.2       | 86.9±6.1        | 85.4-88.5   | 76.1/98.0        |
| <b>LVMI (%)</b>      | 67.6±30.2           | 81.0-105.4  | 85.0/100.9       | 66.0±15.3       | 62.0-69.9   | 42.9/98.0        |

**Table S2. Percent predicted cardiac MRI ventricular volumes, function, and mass by PAH and healthy control cohorts.** Predicted values are obtained from the MESA cohort equations<sup>28</sup> and ref. <sup>27</sup>. RVEDVI, right ventricular end-diastolic volume index; RVESVI, right ventricular end-systolic volume index; RVEF, right ventricular ejection; RVMI, right ventricular mass index; LVEDVI, left ventricular end-diastolic volume index; LVESVI, left ventricular end-systolic volume index; LVEF, left ventricular ejection-fraction; LVMI, left ventricular mass index. \*Indicates P<0.05 versus Healthy Control subjects. Percentiles are based on the weighted average.

|                             | RVFnRec<br>N=22   | No RVFnRec )<br>N=42 | P-value*         | Healthy Control<br>N=62 | P-value†         | P-value‡         |
|-----------------------------|-------------------|----------------------|------------------|-------------------------|------------------|------------------|
| RER                         | 1.14±0.10         | 1.06±0.11            | <b>0.009</b>     | 1.16±0.08               | 0.11             | <b>&lt;0.001</b> |
| Work, (Watts)               | 35[20,60]         | 20[10,40]            | <b>0.018</b>     | 140[118,198]            | <b>&lt;0.001</b> | <b>&lt;0.001</b> |
| VO <sub>2</sub> (mL/kg/min) | 15.1±3.2          | 8.9±3.0              | <b>&lt;0.001</b> | 23.73±7.7               | <b>&lt;0.001</b> | <b>&lt;0.001</b> |
| VO <sub>2</sub> predicted   | 62±14             | 39±12                | <b>&lt;0.001</b> | 100±26                  | <b>&lt;0.001</b> | <b>&lt;0.001</b> |
| Heart Rate (bpm)            | 115[104.0,120.0]  | 110[98,121]          | 0.41             | 157.0[146.0,166.0]      | <b>&lt;0.001</b> | <b>&lt;0.001</b> |
| RAP (mmHg)                  | 7±4               | 11±7                 | 0.14             |                         |                  |                  |
| mPAP (mmHg)                 | 62.5[50.0,69.0]   | 58.8[48.0,68.0]      | 0.53             |                         |                  |                  |
| PCWP (mmHg)                 | 10.6±4.9          | 10.8±4.1             | 0.56             |                         |                  |                  |
| Cardiac Output (L/min)      | 9.9[7.8,12.9]     | 8.3[6.0,10.3]        | <b>0.009</b>     |                         |                  |                  |
| PAO <sub>2</sub> sat (%)    | 45±8              | 41±10                | 0.18             |                         |                  |                  |
| PVR (WU)                    | 5.2[3.1,6.6]      | 5.6[4.3,7.7]         | 0.16             |                         |                  |                  |
| Compliance (mL/mmHg)        | 2.28±0.9          | 1.9±0.7              | 0.13             |                         |                  |                  |
| Ve/VCO <sub>2</sub> at AT   | 37.0[35.0,41.0]   | 42.0[39.0,48.2]      | <b>0.003</b>     | 29.6[27.3,32.2]         | <b>&lt;0.001</b> | <b>&lt;0.001</b> |
| PetCO <sub>2</sub> at AT    | 31.1±3.8          | 27.3±6.5             | <b>0.007</b>     |                         |                  |                  |
| O <sub>2</sub> pulse        | 7.0[6.0,8.1]      | 6.1[5.3,7.1]         | 0.06             | 10.7[9.2,13.0]          | <b>&lt;0.001</b> | <b>&lt;0.001</b> |
| CaO <sub>2</sub> (mL/dL)    | 176.4±21.1        | 178.8±21.0           | 0.64             |                         |                  |                  |
| CvO <sub>2</sub> (mL/dL)    | 87.3±18.4         | 79.6±17.0            | 0.20             |                         |                  |                  |
| Ca-vO <sub>2</sub> (mL/dL)  | 90.4±18.1         | 87.9±30              | 0.58             |                         |                  |                  |
| α distensibility (%/mmHg)   | 0.914[0.00,0.231] | 0.130[0.268,0.290]   | 0.45             |                         |                  |                  |

**Table S3. RV functional recovery (RVFnRec) and No RV functional recovery (No RVFnRec) cohorts peak invasive cardiopulmonary exercise at follow-up and healthy control non-invasive peak exercise variables.** Values are mean ± SD, median [P25,P75]. P values calculated from the Kruskal-Wallis test. RER, respiratory exchange ratio; VO<sub>2</sub>, peak oxygen consumption; RAP, right atrial pressure; mPAP, mean pulmonary artery pressure; PCWP, pulmonary capillary wedge pressure; PAO<sub>2</sub>, pulmonary arterial oxygen saturation; PVR, pulmonary vascular resistance; Ve/VCO<sub>2</sub>, minute ventilation/exhaled carbon dioxide; PetCO<sub>2</sub>, end-tidal CO<sub>2</sub>; O<sub>2</sub>pulse, oxygen pulse (VO<sub>2</sub>/heart rate), CaO<sub>2</sub>, arterial oxygen content; CvO<sub>2</sub>, pulmonary arterial oxygen content; Ca-vO<sub>2</sub>, arterio-venous oxygen content difference; α distensibility, distensibility of the pulmonary arterial system (calculated at exercise). \*P-value for RVFnRec versus No RVFnRec; †=P-value for Healthy Control versus RVFnRec; ‡P-value for Healthy Control versus No RVFnRec.



## Supplemental Figures

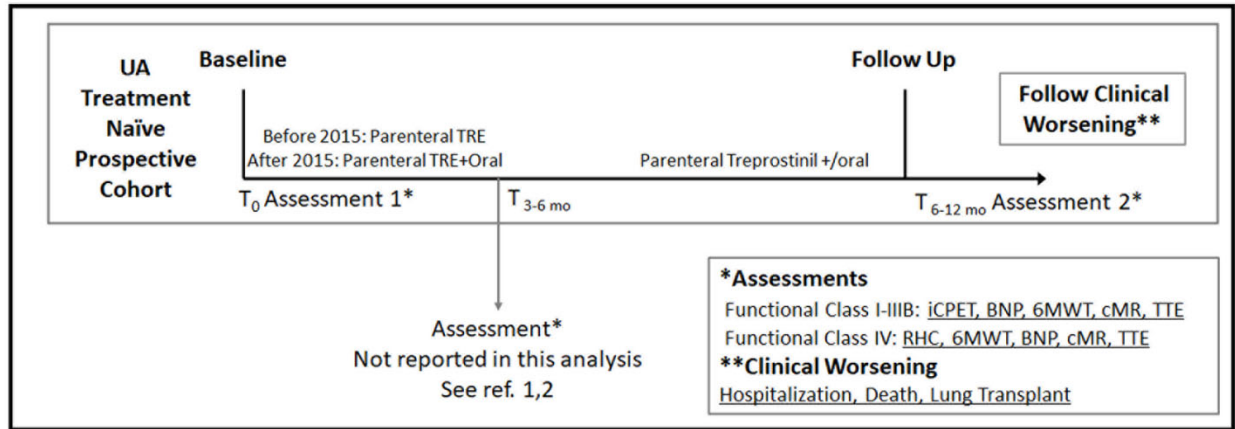

**Figure S1. Schematic of the prospective University of Arizona (UA) treatment naïve cohort.** The current study has omitted the T3-6mo assessment in this analysis to allow for sufficient time for potential RV recovery after treatment changes at that time. Therefore, only baseline and the T6-12month assessment were used in this analysis. Changes at 3-6 months were previously described for a subset of patients in ref. 1,2. TRE, treprostinil; iCPET, invasive cardiopulmonary exercise; BNP, brain natriuretic peptide; CMR, cardiac MRI; 6MWT, 6-minute walk test; TTE, transthoracic echocardiography. \*Assessments include for functional class I-IIIb: iCPET, BNP, 6MWT, cMR, and TTE; for functional class IV: RHC, 6MWT, BNP, cMR, and TTE; \*\*Clinical Worsening defined as hospitalization, lung transplant, and/or death.

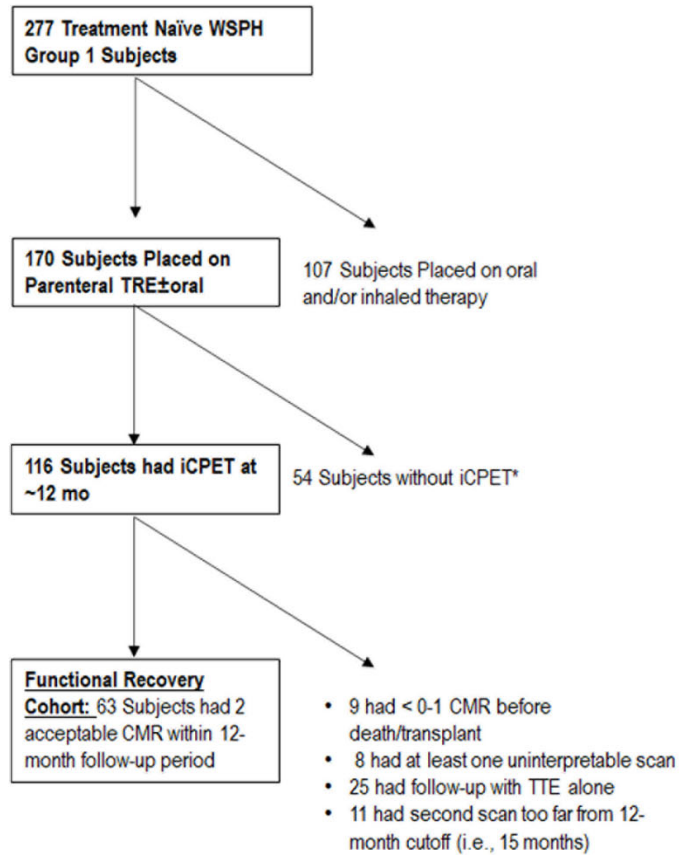

**Figure S2. STROBE (strengthening the reporting of observational studies in epidemiology) diagram describing patient enrollment eligibility for this analysis.** TRE, treprostinil; iCPET, invasive cardiopulmonary exercise testing; CMR, cardiac MRI; TTE, transthoracic echocardiography. \*Some subjects were deemed as too high risk for maximal iCPET (e.g., functional class IV) or had resting only by another research study protocol).

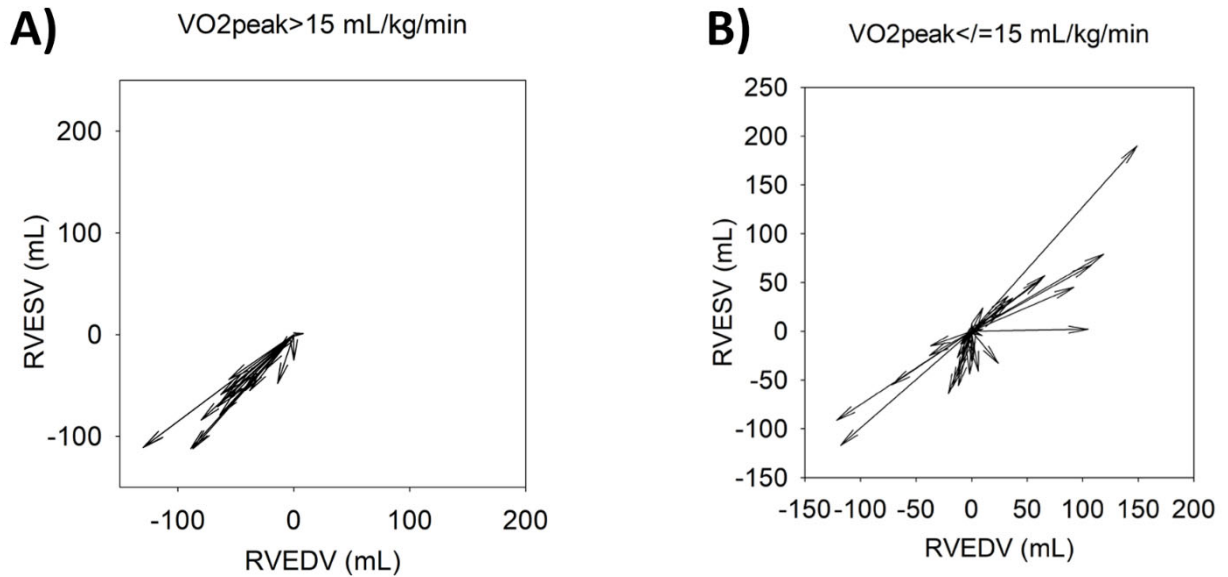

**Figure S3.** Vector Plots demonstrating changes in RV end-systolic (RVESV) and diastolic (RVEDV) volumes from baseline to follow-up by exercise capacity peak oxygen consumption ( $VO_{2peak}$ )  $>$  or  $\leq 15 \text{ mL/kg/min}$ . The high exercise capacity group (A) have a reduction in both ESV and EDV whereas some of the low exercise cohort have a reduction in ESV without a change in EDV (B). Therefore, a drop in RVEDV is necessary for high exercise capacity.

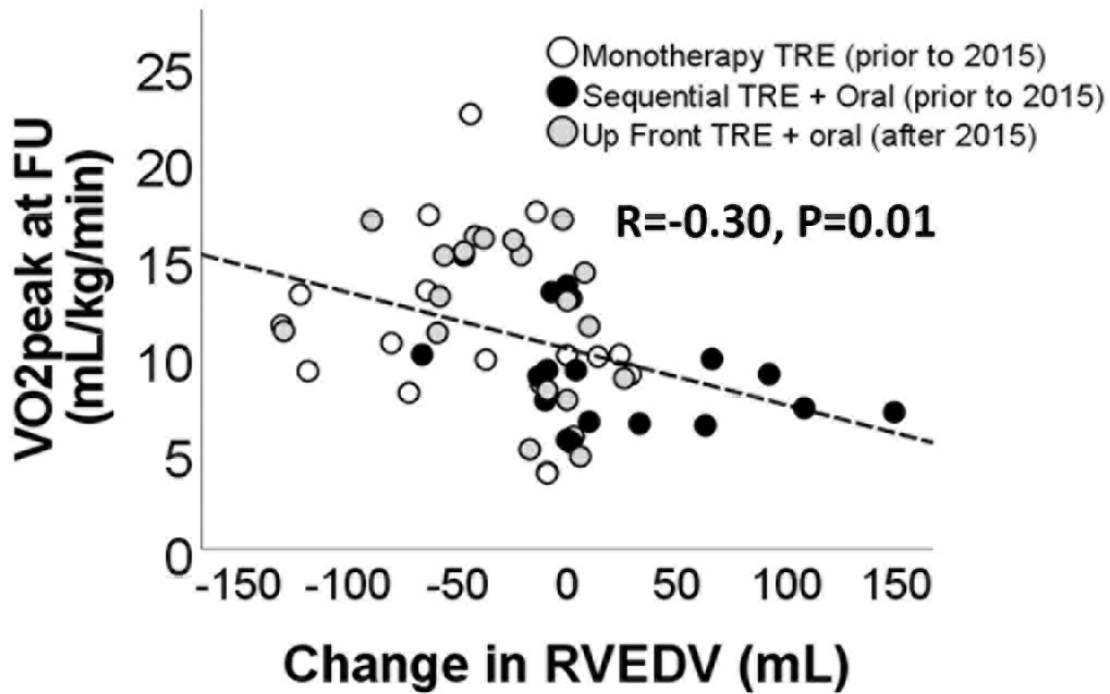

**Figure S4.** The effect of therapeutic approach on change in RVEDV and VO<sub>2</sub>peak at follow-up. Up-front combination therapy was associated with odds-ratio of 10.4 (CI 1.9-56.6, P=0.007) of RVFnRec relative to goal-directed sequential combination therapy. See supplemental methods for therapeutic strategy.

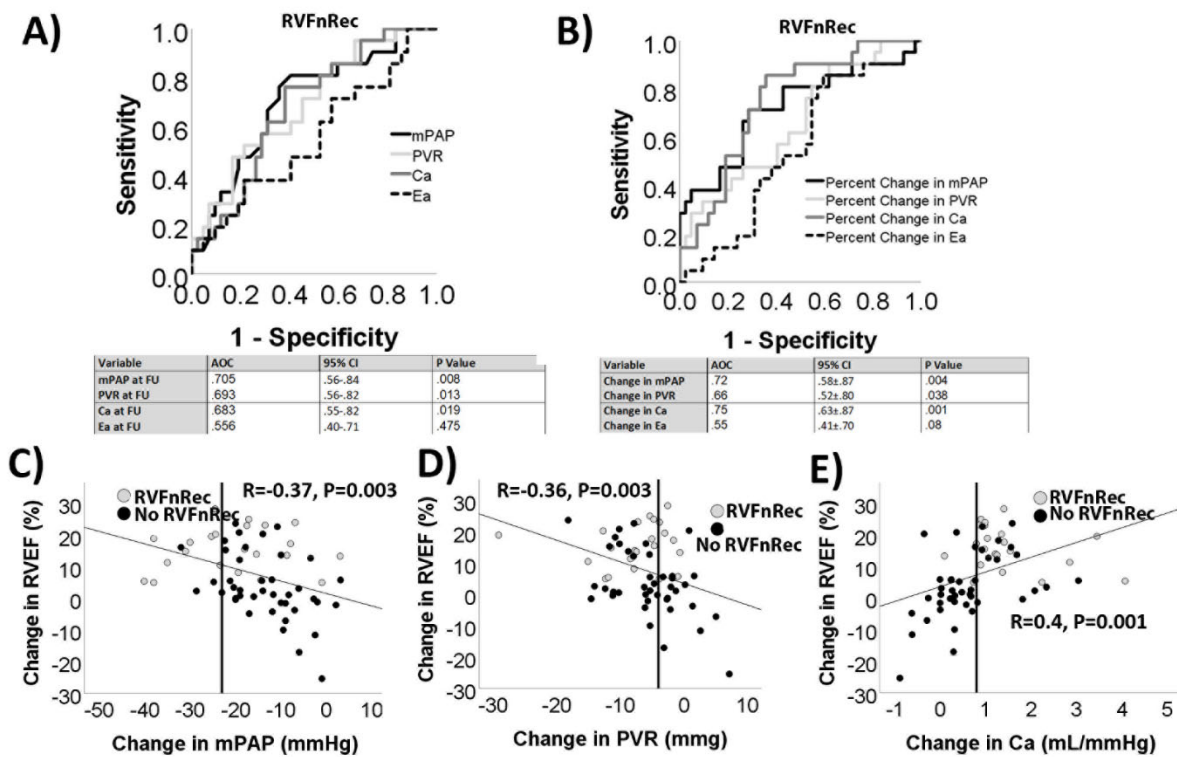

**Figure S5. Afterload changes predicting right ventricular functional recovery.**

Receiver operating curve analysis predicting RVFnRec of absolute values at follow-up (FU) (A) and relative longitudinal changes from baseline to follow-up (B) in mean pulmonary artery pressure (mPAP), PVR, Ca, and effective pulmonary elastance (Ea). Changes in all afterload parameters were mildly correlated changes in RV ejection fraction (RVEF) (C-E).

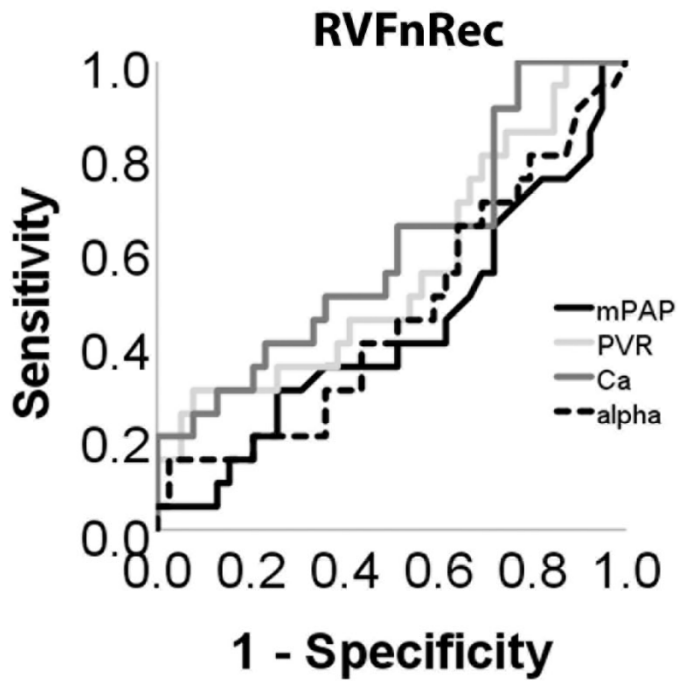

| Variable       | AOC | 95% CI  | P Value |
|----------------|-----|---------|---------|
| Change in mPAP | .43 | .27±.59 | .38     |
| Change in PVR  | .55 | .39±.72 | .50     |
| Change in Ca   | .60 | .45±.77 | .21     |
| Change in Ea   | .46 | .30±.62 | .63     |

**Figure S6.** Receiver operating curve analysis of exercise afterload parameters predicted right ventricular functional recovery at follow-up. At exercise, afterload parameters loose accuracy in predicting RVFnRec.
